# Supplementary material for: Ambient Air Pollution and Depressive Symptoms in Older Adults: Results from the MOBILIZE Boston Study
Source: PubMed Central journal article supplement (PMC4050499; doi:10.1289/ehp.1205909), 2014-03-07
Supplement: ehp.1205909.s001.pdf [file ehp.1205909.s001.pdf]

**Supplemental Material**

**Ambient Air Pollution and Depressive Symptoms in Older Adults:  
Results from the MOBILIZE Boston Study**

Yi Wang, Melissa N. Eliot, Petros Koutrakis, Alexandros Gryparis, Joel D. Schwartz, Brent A. Coull, Murray A. Mittleman, William P. Milberg, Lewis A. Lipsitz, and Gregory A. Wellenius

**Table S1.** Association between mean annual residential black carbon and the presence of depressive symptoms among 732 participants of the MOBILIZE Boston Study. Estimates represent odds ratios (95% CI) for CESD-R  $\geq$  16 as a dichotomous outcome, and the absolute difference in CESD-R score (95% CI) for CESD-R score modeled as a continuous outcome associated with an interquartile range (0.11  $\mu\text{g}/\text{m}^3$ ) increase in mean annual residential black carbon concentration.

| <b>Outcome and Model</b>                      | <b>Point estimate (95% CI)</b> |                |
|-----------------------------------------------|--------------------------------|----------------|
| <b>CESD-R <math>\geq</math> 16 vs &lt; 16</b> |                                | <b>P-value</b> |
| Model 1 <sup>a</sup>                          | 0.92 (0.72,1.19)               | 0.52           |
| Model 2 <sup>b</sup>                          | 0.86 (0.67,1.11)               | 0.25           |
| <b>CESD-R as a continuous variable</b>        |                                | <b>P-value</b> |
| Model 1 <sup>a</sup>                          | 0.05 (-0.43,0.52)              | 0.84           |
| Model 2 <sup>b</sup>                          | 0.03 (-0.44,0.48)              | 0.91           |

<sup>a</sup>Adjusted for age, sex, race/ethnicity, visit, season, day of week, household income, education and neighborhood socioeconomic status at baseline. <sup>b</sup>Additionally adjusted for body mass index, physical activity, alcohol consumption, smoking, diabetes mellitus, hypertension, and hyperlipidemia and use of antidepressant medication at baseline.

**Table S2.** Spearman correlation matrix for daily average pollutant levels in Boston, 2005-2008.

| <b>Pollutant</b>              | <b>PM<sub>2.5</sub></b> | <b>SO<sub>4</sub><sup>2-</sup></b> | <b>BC</b> | <b>UFP</b> | <b>O<sub>3</sub></b> | <b>CO</b> | <b>NO</b> | <b>NO<sub>2</sub></b> |
|-------------------------------|-------------------------|------------------------------------|-----------|------------|----------------------|-----------|-----------|-----------------------|
| PM <sub>2.5</sub>             |                         | 0.87                               | 0.61      | -0.27      | 0.54                 | 0.18      | -0.20     | 0.29                  |
| SO <sub>4</sub> <sup>2-</sup> | 0.83                    |                                    | 0.54      | -0.34      | 0.51                 | 0.20      | -0.28     | 0.17                  |
| BC                            | 0.77                    | 0.65                               |           | -0.01      | 0.05                 | 0.36      | 0.31      | 0.63                  |
| UFP                           | 0.12                    | -0.01                              | 0.17      |            | -0.25                | 0.12      | 0.41      | 0.36                  |
| O <sub>3</sub>                | -0.38                   | -0.23                              | -0.53     | -0.27      |                      | 0.05      | -0.53     | 0.02                  |
| CO                            | 0.49                    | 0.44                               | 0.59      | 0.20       | -0.24                |           | 0.12      | 0.33                  |
| NO                            | 0.60                    | 0.42                               | 0.78      | 0.33       | -0.67                | 0.58      |           | 0.54                  |
| NO <sub>2</sub>               | 0.65                    | 0.53                               | 0.67      | 0.34       | -0.52                | 0.53      | 0.70      |                       |

Correlations in warm season are shown in the upper right triangle and correlations in the cool season are shown in the lower left triangle. Symbols: BC = black carbon; UFP = ultrafine particles.

**Table S3.** Odds ratios (ORs) of CESD-R  $\geq 16$  associated with an interquartile range (IQR) increase in pollutant levels over the past 2 weeks in the warm and cool seasons.<sup>a</sup> Note that IQR for each pollutant is season-specific.

| <b>Pollutant</b>              | <b>Unit</b>         | <b>Warm Season<br/>IQR</b> | <b>Warm Season<br/>OR (95% CI)</b> | <b>p</b> | <b>Cool Season<br/>IQR</b> | <b>Cool Season<br/>OR (95% CI)</b> | <b>p</b> |
|-------------------------------|---------------------|----------------------------|------------------------------------|----------|----------------------------|------------------------------------|----------|
| PM <sub>2.5</sub>             | μg/m <sup>3</sup>   | 4.47                       | 0.64 (0.28,1.45)                   | 0.28     | 2.87                       | 0.74 (0.42,1.32)                   | 0.31     |
| SO <sub>4</sub> <sup>2-</sup> | μg/m <sup>3</sup>   | 1.78                       | 0.78 (0.35,1.72)                   | 0.53     | 0.88                       | 0.79 (0.49,1.27)                   | 0.33     |
| Black carbon                  | μg/m <sup>3</sup>   | 0.23                       | 0.91 (0.61, 1.36)                  | 0.65     | 0.22                       | 1.16 (0.79,1.69)                   | 0.44     |
| UFP                           | 1000/m <sup>3</sup> | 4.26                       | 1.82 (0.64, 5.15)                  | 0.26     | 6.92                       | 0.89 (0.52, 1.52)                  | 0.66     |
| O <sub>3</sub>                | ppb                 | 6.69                       | 1.01 (0.74,1.37)                   | 0.95     | 6.74                       | 0.77 (0.57, 1.04)                  | 0.09     |
| CO                            | ppm                 | 0.11                       | 1.13 (0.82,1.56)                   | 0.46     | 0.13                       | 1.20 (0.83,1.71)                   | 0.33     |
| NO                            | ppb                 | 2.39                       | 0.98 (0.85,1.14)                   | 0.83     | 6.41                       | 1.35 (0.98,1.85)                   | 0.06     |
| NO <sub>2</sub>               | ppb                 | 2.52                       | 1.03 (0.80, 1.33)                  | 0.79     | 3.64                       | 1.38 (0.98,1.93)                   | 0.06     |

<sup>a</sup>From models adjusted for age, sex, race/ethnicity, visit, ambient and dew point temperature, barometric pressure, day of week, season and long-term temporal trends. Warm season was defined as April through September.
